# Supplementary material
Source: PubMed Central journal article supplement (PMC5885880)
Supplement: jamaotolaryngolheadnecksurg-144-203-s001.pdf [file jamaotolaryngolheadnecksurg-144-203-s001.pdf]

## Supplementary Online Content

Bertelsen C, Shoffel-Havakuk H, O'Dell K, Johns MM, Reder L. Serial in-office intralesional steroid injections in airway stenosis. *JAMA Otolaryngol Head Neck Surg*. Published online January 11, 2018. doi:10.1001/jamaoto.2017.2800

### **eTable.** Patient Characteristics

This supplementary material has been provided by the authors to give readers additional information about their work.

**eTable. Patient Characteristics**

|                                         | <b>Total cohort (n=24)</b> |
|-----------------------------------------|----------------------------|
| <b>Follow up (months), mean (range)</b> | 32.3 (5, 168)              |
| <b>Age (years), mean (range)</b>        | 50.1 (19, 76)              |
| <b>Gender</b>                           | <b>N (%)</b>               |
| Male                                    | 6 (25)                     |
| Female                                  | 18 (75)                    |
| <b>Cotton Myer Grade</b>                | <b>N (%)</b>               |
| I                                       | 10 (41.7)                  |
| II                                      | 3 (12.5)                   |
| III                                     | 5 (20.8)                   |
| IV                                      | 5 (20.8)                   |
| Unknown                                 | 1 (4.1)                    |
| <b>Length (cm)</b>                      | <b>N (%)</b>               |
| 0-1                                     | 2 (8.3)                    |
| 1-2                                     | 15 (62.5)                  |
| >2                                      | 4 (16.7)                   |
| UTA                                     | 3 (12.5)                   |
| <b>Comorbidities</b>                    | <b>N (%)</b>               |
| DM                                      | 3 (12.5)                   |
| HTN                                     | 3 (12.5)                   |
| Obesity                                 | 3 (12.5)                   |
| CAD                                     | 2 (8.3)                    |
| GERD                                    | 6 (25)                     |
| Rheumatologic Dx                        | 6 (25)                     |
| <b>Location of stenosis</b>             | <b>N (%)</b>               |
| Subglottis                              | 18 (75)                    |
| Subglottis + proximal trachea           | 6 (25)                     |
